# Supplementary material for: Patterns of Care for Radiotherapy in the Neoadjuvant and Adjuvant Treatment of Gastric Cancer: A Twelve-Year Nationwide Cohort Study in Korea
Source: PubMed Central journal article supplement — Cancer Res Treat. 2017 Mar 8;50(1):118–28. doi: 10.4143/crt.2016.575 (PMC5784630; doi:10.4143/crt.2016.575), 2017-03-08
Supplement: crt-2016-575-suppl1.pdf [file crt-2016-575-suppl1.pdf]

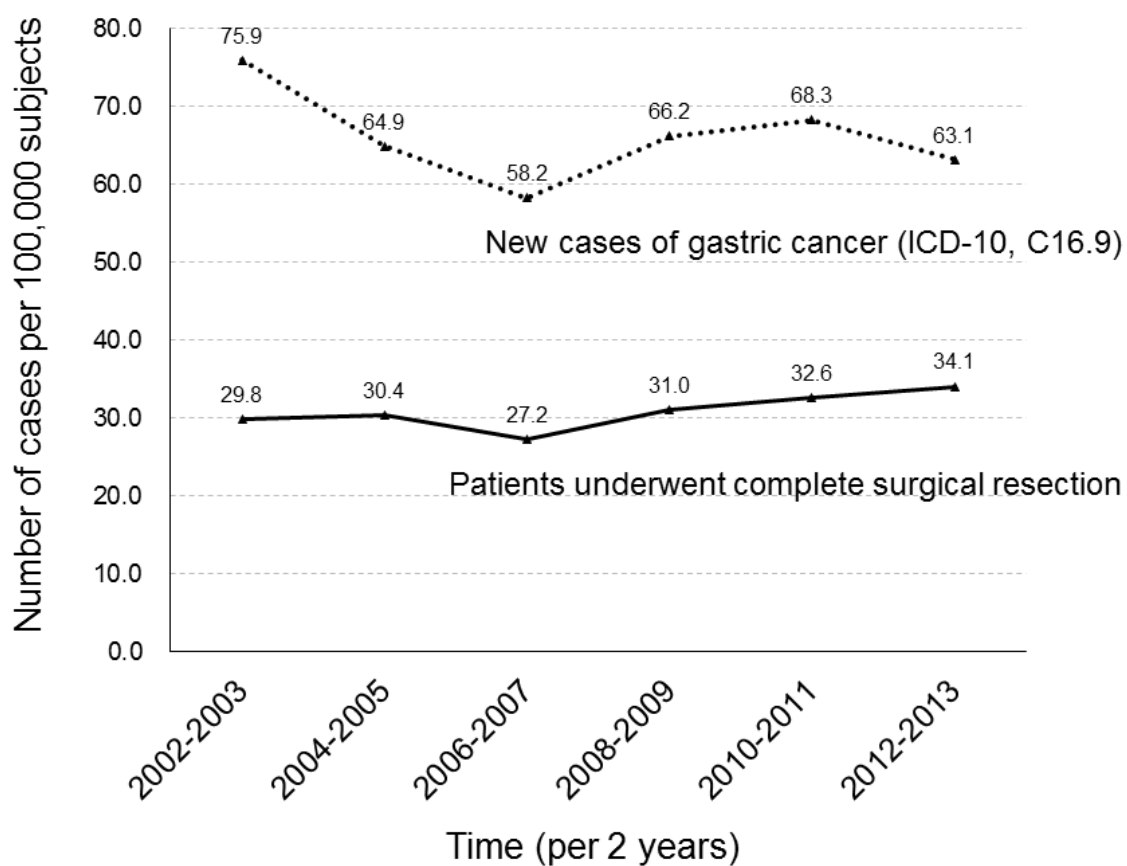

**S1 Fig.** Gastric cancer and gastrectomies from 2002 to 2013. The figure shows the crude rates of gastric cancer (dotted line) and the number of patients who underwent gastrectomy (solid line) in Korea (data from the National Health Insurance Service-National Sample Cohort). ICD-10, International Classification of Diseases 10th revision.
