# Supplementary material for: Patterns of Care for Radiotherapy in the Neoadjuvant and Adjuvant Treatment of Gastric Cancer: A Twelve-Year Nationwide Cohort Study in Korea
Source: PubMed Central journal article supplement — Cancer Res Treat. 2017 Mar 8;50(1):118–28. doi: 10.4143/crt.2016.575 (PMC5784630; doi:10.4143/crt.2016.575), 2017-03-08
Supplement: crt-2016-575-suppl4.pdf [file crt-2016-575-suppl4.pdf]

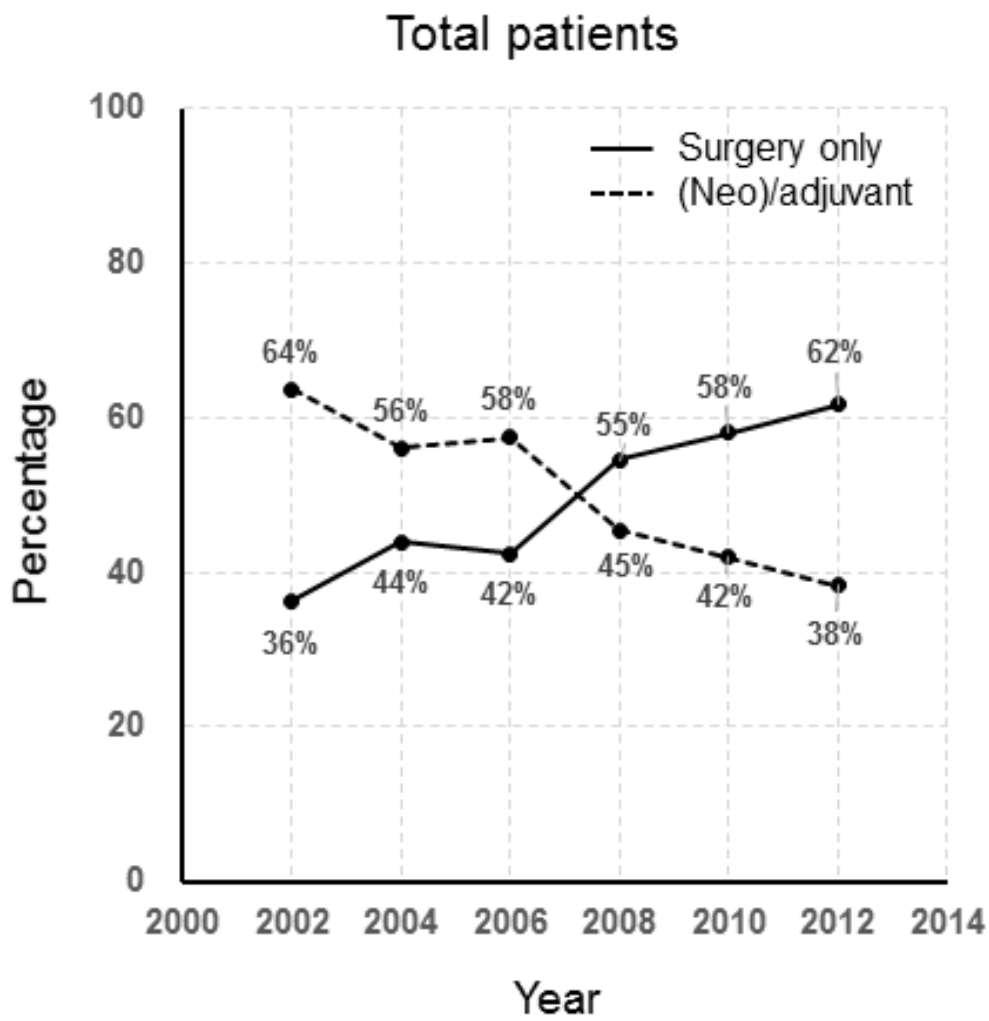

**S4 Fig.** The temporal trends of patients treated with or without neoadjuvant or adjuvant treatment following gastrectomy for gastric cancer from 2002 to 2013 in Korea.
