# Supplementary material for: Patterns of Care for Radiotherapy in the Neoadjuvant and Adjuvant Treatment of Gastric Cancer: A Twelve-Year Nationwide Cohort Study in Korea
Source: PubMed Central journal article supplement — Cancer Res Treat. 2017 Mar 8;50(1):118–28. doi: 10.4143/crt.2016.575 (PMC5784630; doi:10.4143/crt.2016.575), 2017-03-08
Supplement: crt-2016-575-suppl5.pdf [file crt-2016-575-suppl5.pdf]

**S5 Table.** Demographic characteristics of gastric cancer patients treated with gastrectomy and (neo-)adjuvant chemotherapy by year of diagnosis (per 2 years)

| Variable                   | 2002-2003  | 2004-2005  | 2006-2007  | 2008-2009  | 2010-2011  | 2012-2013  | p-value <sup>a)</sup> |
|----------------------------|------------|------------|------------|------------|------------|------------|-----------------------|
| Sex                        |            |            |            |            |            |            |                       |
| Male                       | 226 (64.8) | 245 (71.9) | 205 (65.4) | 198 (70.2) | 188 (68.9) | 165 (63.1) | 0.127                 |
| Female                     | 123 (35.2) | 96 (28.1)  | 108 (34.6) | 84 (29.8)  | 85 (31.1)  | 97 (36.9)  |                       |
| Age (yr)                   |            |            |            |            |            |            |                       |
| 20-49                      | 95 (27.1)  | 90 (26.4)  | 64 (20.6)  | 53 (18.7)  | 52 (18.9)  | 33 (12.7)  | < 0.001               |
| 50-59                      | 69 (19.8)  | 86 (25.2)  | 80 (25.5)  | 76 (27.0)  | 70 (25.7)  | 78 (29.9)  |                       |
| 60-69                      | 128 (36.6) | 106 (31.2) | 98 (31.2)  | 96 (33.9)  | 81 (29.6)  | 73 (28.0)  |                       |
| 70-79                      | 58 (16.5)  | 59 (17.2)  | 71 (22.7)  | 58 (20.4)  | 70 (25.7)  | 77 (29.5)  |                       |
| ≥ 80                       | 50 (14.4)  | 60 (17.5)  | 88 (27.4)  | 66 (23.3)  | 69 (25.4)  | 63 (23.9)  |                       |
| Surgery type               |            |            |            |            |            |            |                       |
| TG                         | 96 (27.4)  | 92 (26.9)  | 86 (27.4)  | 77 (27.3)  | 85 (31.1)  | 82 (31.3)  | 0.701                 |
| STG/PG                     | 254 (72.6) | 249 (73.1) | 227 (72.6) | 205 (72.7) | 188 (68.9) | 179 (68.7) |                       |
| Charlson comorbidity index |            |            |            |            |            |            |                       |
| 0-1                        | 296 (84.6) | 245 (71.9) | 209 (66.7) | 151 (53.6) | 135 (49.3) | 104 (39.9) | <.001                 |
| 2                          | 27 (7.8)   | 59 (17.5)  | 53 (16.8)  | 71 (25.3)  | 59 (21.4)  | 58 (22.0)  |                       |
| 3                          | 14 (3.9)   | 13 (3.7)   | 22 (7.2)   | 28 (10.0)  | 32 (11.8)  | 35 (13.4)  |                       |
| 4                          | 13 (3.6)   | 23 (6.9)   | 29 (9.3)   | 31 (11.1)  | 48 (17.5)  | 64 (24.6)  |                       |
| ≥ 5                        | 0 (0)      | 0 (0)      | 0 (0)      | 0 (0)      | 0 (0)      | 0 (0)      |                       |
| Income                     |            |            |            |            |            |            |                       |
| ≤ 20 percentile            | 64 (18.4)  | 49 (14.3)  | 46 (14.6)  | 34 (12.1)  | 46 (16.8)  | 38 (14.6)  | 0.545                 |
| 21-80 percentile           | 192 (55.0) | 178 (52.1) | 173 (55.1) | 161 (57.1) | 148 (54.3) | 143 (54.9) |                       |
| ≥ 81 percentile            | 93 (26.5)  | 114 (33.5) | 95 (30.2)  | 87 (30.8)  | 79 (28.9)  | 80 (30.6)  |                       |
| Health insurance type      |            |            |            |            |            |            |                       |
| NHI                        | 343 (98.3) | 323 (94.8) | 306 (97.8) | 278 (98.6) | 260 (95.4) | 251 (95.9) | 0.016                 |
| Medical aid                | 6 (1.7)    | 18 (5.2)   | 7 (2.2)    | 4 (1.4)    | 13 (4.6)   | 11 (4.1)   |                       |
| Residential area           |            |            |            |            |            |            |                       |
| Metropolitan               | 161 (46.1) | 165 (48.4) | 138 (43.9) | 139 (49.5) | 138 (50.4) | 119 (45.5) | 0.580                 |
| Nonmetropolitan            | 188 (53.9) | 176 (51.6) | 176 (56.1) | 142 (50.5) | 136 (49.6) | 142 (54.5) |                       |
| Hospital location          |            |            |            |            |            |            |                       |
| Metropolitan               | 313 (89.7) | 308 (90.5) | 274 (87.5) | 250 (88.6) | 236 (86.4) | 213 (81.3) | 0.013                 |

|                        |            |            |            |            |            |            |       |
|------------------------|------------|------------|------------|------------|------------|------------|-------|
| Nonmetropolitan        | 36 (10.3)  | 32 (9.5)   | 39 (12.5)  | 32 (11.4)  | 37 (13.6)  | 49 (18.7)  |       |
| Hospital volume (beds) |            |            |            |            |            |            |       |
| < 1,000                | 158 (45.3) | 140 (41.3) | 126 (40.2) | 110 (39.1) | 108 (39.6) | 122 (46.6) | 0.300 |
| ≥ 1,000                | 191 (54.7) | 200 (58.7) | 187 (59.8) | 172 (60.9) | 165 (60.4) | 139 (53.4) |       |
| Disabled status        |            |            |            |            |            |            |       |
| No                     | 328 (93.9) | 315 (92.6) | 281 (89.7) | 262 (93.1) | 243 (88.9) | 225 (86.2) | 0.008 |
| Yes                    | 21 (6.1)   | 25 (7.4)   | 32 (10.3)  | 20 (6.9)   | 30 (11.1)  | 36 (13.8)  |       |

---

Values are presented as number (%). TG, total gastrectomy; STG/PG, subtotal gastrectomy/partial gastrectomy; NHI, National Health Insurance. <sup>a)</sup>The linear-by-linear association test was used to examine linear association between the (2) yearly increase and differences in proportions for categorical data.
