# Supplementary material for: Patterns of Care for Radiotherapy in the Neoadjuvant and Adjuvant Treatment of Gastric Cancer: A Twelve-Year Nationwide Cohort Study in Korea
Source: PubMed Central journal article supplement — Cancer Res Treat. 2017 Mar 8;50(1):118–28. doi: 10.4143/crt.2016.575 (PMC5784630; doi:10.4143/crt.2016.575), 2017-03-08
Supplement: crt-2016-575-suppl8.pdf [file crt-2016-575-suppl8.pdf]

**S8 Table.** Multivariate Cox proportional hazards survival analysis for gastric cancer patients who underwent gastrectomy with neoadjuvant or adjuvant treatment from 2002 to 2013

| Variable                      | Overall survival |          |      |             |         | Disease-specific survival |      |             |         |
|-------------------------------|------------------|----------|------|-------------|---------|---------------------------|------|-------------|---------|
|                               | No.              | 5-Yr (%) | HR   | 95% CI      | p-value | 5-Yr (%)                  | HR   | 95% CI      | p-value |
| Year of surgery (per 2 years) | 1,819            | 66.5     | 0.98 | 0.95-1.01   | 0.249   | 71.1                      | 1.00 | 0.97-1.04   | 0.858   |
| Sex                           |                  |          |      |             |         |                           |      |             |         |
| Male                          | 1,227            | 65.8     | 1    | (reference) | –       | 71.1                      | 1    | (reference) | –       |
| Female                        | 592              | 68.2     | 0.90 | 0.76-1.08   | 0.256   | 71.3                      | 1.01 | 0.82-1.23   | 0.938   |
| Age (yr)                      |                  |          |      |             |         |                           |      |             |         |
| 20-49                         | 386              | 72.3     | 0.97 | 0.75-1.25   | 0.805   | 72.5                      | 1.10 | 0.83-1.47   | 0.505   |
| 50-59                         | 459              | 72.7     | 1    | (reference) | –       | 75.6                      | 1    | (reference) | –       |
| 60-69                         | 581              | 65.8     | 1.37 | 1.10-1.72   | 0.006   | 71.2                      | 1.40 | 1.07-1.82   | 0.013   |
| 70-89                         | 392              | 54.7     | 2.18 | 1.72-2.76   | < 0.001 | 64.2                      | 2.08 | 1.56-2.76   | < 0.001 |
| Surgery type                  |                  |          |      |             |         |                           |      |             |         |
| TG                            | 517              | 48.5     | 1    | (reference) | –       | 52.1                      | 1    | (reference) | –       |
| STG/PG                        | 1,302            | 73.7     | 0.42 | 0.35-0.49   | < 0.001 | 78.6                      | 0.35 | 0.29-0.42   | < 0.001 |
| Charlson comorbidity index    |                  |          |      |             |         |                           |      |             |         |
| 0-1                           | 1,139            | 67.5     | 1    | (reference) | –       | 69.9                      | 1    | (reference) | –       |
| 2                             | 327              | 69.3     | 0.97 | 0.78-1.21   | 0.807   | 72.7                      | 0.84 | 0.65-1.09   | 0.197   |
| 3                             | 144              | 67.6     | 0.95 | 0.69-1.32   | 0.771   | 80.3                      | 0.57 | 0.36-0.88   | 0.011   |
| ≥ 4                           | 209              | 55.1     | 1.38 | 1.06-1.78   | 0.016   | 71.9                      | 0.87 | 0.62-1.23   | 0.441   |
| Income                        |                  |          |      |             |         |                           |      |             |         |
| ≤ 20 percentile               | 277              | 64.7     | 1.01 | 0.76-1.33   | 0.966   | 68.3                      | 1.05 | 0.85-1.30   | 0.635   |
| 21-80 percentile              | 995              | 68.4     | 1    | (reference) | –       | 73.1                      | 1    | (reference) | –       |

|                        |       |      |      |             |       |      |      |             |       |
|------------------------|-------|------|------|-------------|-------|------|------|-------------|-------|
| ≥ 81 percentile        | 547   | 64.1 | 1.01 | 0.83-1.22   | 0.928 | 69.1 | 0.98 | 0.72-1.34   | 0.923 |
| Health insurance type  |       |      |      |             |       |      |      |             |       |
| NHI                    | 1,761 | 67.1 | 1    | (reference) | –     | 71.8 | 1    | (reference) | –     |
| Medical aid            | 58    | 48.5 | 1.75 | 1.08-2.82   | 0.022 | 48.5 | 2.04 | 1.25-3.35   | 0.004 |
| Residential area       |       |      |      |             |       |      |      |             |       |
| Metropolitan           | 859   | 66.9 | 1    | (reference) | –     | 71.7 | 1    | (reference) | –     |
| Nonmetropolitan        | 960   | 66.2 | 0.91 | 0.76-1.08   | 0.285 | 70.7 | 0.92 | 0.76-1.11   | 0.385 |
| Hospital location      |       |      |      |             |       |      |      |             |       |
| Metropolitan           | 1,594 | 66.9 | 1    | (reference) | –     | 71.5 | 1    | (reference) | –     |
| Nonmetropolitan        | 225   | 63.9 | 1.02 | 0.79-1.32   | 0.887 | 68.4 | 1.14 | 0.85-1.54   | 0.381 |
| Hospital volume (beds) |       |      |      |             |       |      |      |             |       |
| < 1,000                | 765   | 64.6 | 1    | (reference) | –     | 69.6 | 1    | (reference) | –     |
| 1,000-1,999            | 707   | 71.2 | 0.91 | 0.76-1.09   | 0.289 | 75.1 | 0.84 | 0.68-1.04   | 0.116 |
| ≥ 2,000                | 347   | 61.4 | 1.09 | 0.88-1.36   | 0.432 | 66.4 | 1.01 | 0.78-1.31   | 0.921 |
| Disabled status        |       |      |      |             |       |      |      |             |       |
| No                     | 1,654 | 66.9 | 1    | (reference) | –     | 71.1 | 1    | (reference) | –     |
| Yes                    | 165   | 62.9 | 1.26 | 0.88-1.36   | 0.432 | 71.5 | 1.11 | 0.79-1.55   | 0.551 |
| RT use                 |       |      |      |             |       |      |      |             |       |
| No                     | 1,741 | 67.1 | 1    | (reference) | –     | 71.4 | 1    | (reference) | –     |
| Yes                    | 78    | 58.0 | 1.35 | 0.95-1.93   | 0.1   | 68.7 | 1.15 | 0.74-1.79   | 0.541 |

HR, hazard ratio; CI, confidence interval; RT, radiation therapy; TG, total gastrectomy; STG/PG, subtotal gastrectomy/partial gastrectomy; NHI, National Health Insurance.
